# Supplementary material for: Understanding physical chemistry of BaxSr1−xTiO3 using ReaxFF molecular dynamics simulations
Source: Royal Society of Chemistry journal article supplement (doi:10.1039/d1cp03353k), 2021-01-01
Supplement: d1cp03353k1.pdf [file d1cp03353k1.pdf]

## Supporting Information

### Understanding Physical Chemistry of $\text{Ba}_x\text{Sr}_{1-x}\text{TiO}_3$ using ReaxFF Molecular Dynamics

#### Simulations

*Dooman Akbarian<sup>1</sup>, Nadire Nayir<sup>1,2,3</sup> and Adri C. T. van Duin<sup>1,2\*</sup>*

<sup>1</sup> Department of Mechanical Engineering, Pennsylvania State University, University Park, Pennsylvania 16802, United States.

<sup>2</sup> 2-Dimensional Crystal Consortium (2DCC) Materials Research Institute, The Pennsylvania State University, University Park, Pennsylvania 16802, United States.

<sup>3</sup> Department of Physics, Karamanoglu Mehmetbey University, Karaman 70000, Turkey.

#### ReaxFF Optimization Method

In ReaxFF, a successive one-parameter search algorithm was employed to minimize the sum-of-squares error function (Equation S1)<sup>1</sup>. The orders of fitted parameters are as follows. Atom, bond, off-diagonal, valence angle, and torsion angle, respectively.

$$Error = \sum_{i=1}^n \left[ \frac{\chi_{i,QM} - \chi_{i,ReaxFF}}{\sigma_i} \right]^2 \quad (S1)$$

where  $\chi_{i,QM}$  is a *QM* value,  $\chi_{i,ReaxFF}$  is a ReaxFF value, and  $\sigma_i$  is a weight assigned to data point  $i$ . A total of 37 parameters were fitted to a training set using a successive single-parameter search technique, using multiple cycles to account for parameter correlation.

## Force Field developed in this study

Reactive MD-force field: BaTiO<sub>3</sub>/SrTiO Aug 2021

39 ! Number of general parameters  
50.0000 !Overcoordination parameter  
9.5469 !Overcoordination parameter  
1.6725 !Valency angle conjugation parameter  
1.7224 !Triple bond stabilisation parameter  
6.8702 !Triple bond stabilisation parameter  
60.4850 !C2-correction  
1.0588 !Undercoordination parameter  
4.6000 !Triple bond stabilisation parameter  
12.1176 !Undercoordination parameter  
13.3056 !Undercoordination parameter  
-70.5044 !Triple bond stabilization energy  
0.0000 !Lower Taper-radius  
10.0000 !Upper Taper-radius  
2.8793 !Not used  
33.8667 !Valency undercoordination  
6.0891 !Valency angle/lone pair parameter  
1.0563 !Valency angle  
2.0384 !Valency angle parameter  
6.1431 !Not used  
6.9290 !Double bond/angle parameter  
0.3989 !Double bond/angle parameter: overcoord  
3.9954 !Double bond/angle parameter: overcoord  
-2.4837 !Not used  
5.7796 !Torsion/BO parameter  
10.0000 !Torsion overcoordination  
1.9487 !Torsion overcoordination  
-1.2327 !Conjugation 0 (not used)  
2.1645 !Conjugation  
1.5591 !vdWaals shielding  
0.1000 !Cutoff for bond order (\*100)  
1.7602 !Valency angle conjugation parameter  
0.6991 !Overcoordination parameter  
50.0000 !Overcoordination parameter

1.8512 !Valency/lone pair parameter  
 0.5000 !Not used  
 20.0000 !Not used  
 5.0000 !Molecular energy (not used)  
 0.0000 !Molecular energy (not used)  
 0.7903 !Valency angle conjugation parameter  
 14 ! Nr of atoms; cov.r; valency;a.m;Rvdw;Evdw;gammaEEM;cov.r2;#  
     alfa;gammavdW;valency;Eunder;Eover;chiEEM;etaEEM;n.u.  
     cov r3;Elp;Heat inc.;n.u.;n.u.;n.u.;n.u.  
     ov/un;val1;n.u.;val3,vval4  
 C 1.3817 4.0000 12.0000 1.8903 0.1838 0.9000 1.1341 4.0000  
    9.7559 2.1346 4.0000 34.9350 79.5548 5.9666 7.0000 0.0000  
    1.2114 0.0000 202.2908 8.9539 34.9289 13.5366 0.8563 0.0000  
    -2.8983 2.5000 1.0564 4.0000 2.9663 0.0000 0.0000 0.0000  
 H 0.8930 1.0000 1.0080 1.3550 0.0930 0.8203 -0.1000 1.0000  
    8.2230 33.2894 1.0000 0.0000 121.1250 3.7248 9.6093 1.0000  
    -0.1000 0.0000 55.1878 3.0408 2.4197 0.0003 1.0698 0.0000  
    -19.4571 4.2733 1.0338 1.0000 2.8793 0.0000 0.0000 0.0000  
 O 1.2450 2.0000 15.9990 2.3890 0.1000 1.0898 1.0548 6.0000  
    9.7300 13.8449 4.0000 37.5000 116.0768 8.5000 8.3122 2.0000  
    0.9049 0.4056 68.0152 3.5027 0.7640 0.0021 0.9745 0.0000  
    -3.5500 2.9000 1.0493 4.0000 2.9225 0.0000 0.0000 0.0000  
 N 1.2333 3.0000 14.0000 1.9324 0.1376 0.7921 1.1748 5.0000  
    10.0667 7.8431 4.0000 32.2482 100.0000 7.5795 6.3952 2.0000  
    1.0433 27.4290 119.9837 1.9457 4.2874 3.4869 0.9745 0.0000  
    -4.3875 2.6192 1.0183 4.0000 2.8793 0.0000 0.0000 0.0000  
 S 1.9405 2.0000 32.0600 2.0677 0.2099 1.0336 1.5479 6.0000  
    9.9575 4.9055 4.0000 52.9998 112.1416 5.7824 8.2545 2.0000  
    1.4601 9.7177 71.1843 5.7487 23.2859 12.7147 0.9745 0.0000  
    -11.0000 2.7466 1.0338 6.2998 2.8793 0.0000 0.0000 0.0000  
 Mg 1.8315 2.0000 24.3050 2.2464 0.1806 0.5020 1.0000 2.0000  
    10.9186 27.1205 3.0000 38.0000 0.0000 0.9499 5.6130 0.0000  
    -1.3000 0.0000 127.9160 49.9248 0.3370 0.0000 0.0000 0.0000  
    -1.0823 2.3663 1.0564 6.0000 2.9663 0.0000 0.0000 0.0000  
 P 1.5994 3.0000 30.9738 1.7000 0.1743 1.0000 1.3000 5.0000  
    9.1909 14.9482 5.0000 0.0000 0.0000 1.6676 7.0946 0.0000  
    -1.0000 25.0000 125.6300 0.2187 21.4305 15.1425 0.0000 0.0000  
    -3.9294 3.4831 1.0338 5.0000 2.8793 0.0000 0.0000 0.0000

|    |                                                       |          |          |          |         |         |          |         |        |
|----|-------------------------------------------------------|----------|----------|----------|---------|---------|----------|---------|--------|
| Na | 1.8000                                                | 1.0000   | 22.9898  | 2.8270   | 0.1872  | 0.4000  | -1.0000  | 1.0000  |        |
|    | 10.0000                                               | 2.5000   | 1.0000   | 0.0000   | 0.0000  | -0.9871 | 6.7728   | 0.0000  |        |
|    | -1.0000                                               | 0.0000   | 23.0445  | 100.0000 | 1.0000  | 0.0000  | 0.8563   | 0.0000  |        |
|    | -2.5000                                               | 3.9900   | 1.0338   | 8.0000   | 2.5791  | 0.0000  | 0.0000   | 0.0000  |        |
| Ti | 2.0254                                                | 4.0000   | 47.8800  | 2.2105   | 0.1574  | 0.5448  | 0.1000   | 4.0000  |        |
|    | 12.7041                                               | 16.6482  | 4.0000   | 0.1000   | 0.0000  | -1.8355 | 6.8739   | 0.0000  |        |
|    | -1.0000                                               | 0.0000   | 143.1770 | 27.6505  | -0.0753 | 0.0064  | 0.8563   | 0.0000  |        |
|    | -15.0000                                              | 3.8359   | 1.0338   | 12.0000  | 2.2632  | 0.0000  | 0.0000   | 0.0000  |        |
| Cl | 1.7140                                                | 1.0000   | 35.4500  | 1.9139   | 0.2000  | 0.3500  | -1.0000  | 7.0000  |        |
|    | 11.5345                                               | 10.1330  | 1.0000   | 0.0000   | 0.0000  | 9.9704  | 6.1703   | 0.0000  |        |
|    | -1.0000                                               | 1.2769   | 143.1770 | 6.2293   | 5.2294  | 0.1542  | 0.8563   | 0.0000  |        |
|    | -10.2080                                              | 2.9867   | 1.0338   | 6.2998   | 2.5791  | 0.0000  | 0.0000   | 0.0000  |        |
| F  | 1.2100                                                | 1.0000   | 18.9984  | 1.8601   | 0.1200  | 0.3000  | -0.1000  | 7.0000  |        |
|    | 11.5000                                               | 7.5000   | 4.0000   | 9.2533   | 0.2000  | 9.0000  | 15.0000  | 0.0000  |        |
|    | -1.0000                                               | 35.0000  | 1.5000   | 6.9821   | 4.1799  | 1.0561  | 0.0000   | 0.0000  |        |
|    | -7.3000                                               | 2.6656   | 1.0493   | 4.0000   | 2.9225  | 0.0000  | 0.0000   | 0.0000  |        |
| Ba | 2.5456                                                | 2.0000   | 137.3270 | 2.7000   | 0.2962  | 0.4492  | -1.0000  | 2.0000  |        |
|    | 10.3042                                               | 47.4978  | 2.0000   | -5.0000  | 0.0000  | -4.4485 | 5.5000   | 0.0000  |        |
|    | -1.0000                                               | 0.0000   | 143.1770 | 109.4891 | 9.4011  | 0.0147  | 0.8563   | 0.0000  |        |
|    | -7.5000                                               | 2.9867   | 1.0338   | 2.0000   | 2.5791  | 0.0000  | 0.0000   | 0.0000  |        |
| Sr | 2.1997                                                | 2.0000   | 87.6200  | 2.5141   | 0.3839  | 0.3983  | 1.0000   | 2.0000  |        |
|    | 11.1452                                               | 27.5993  | 3.0000   | 0.0000   | 0.0000  | -4.2868 | 6.5000   | 0.0000  |        |
|    | -1.3000                                               | 0.0000   | 220.0000 | 49.9248  | 0.3370  | 0.0000  | 0.0000   | 0.0000  |        |
|    | -25.0000                                              | 4.0000   | 1.0564   | 6.2998   | 2.9663  | 1.0000  | 0.1000   | 13.0000 |        |
| X  | -0.1000                                               | 2.0000   | 1.0080   | 2.0000   | 0.0000  | 0.0100  | -0.1000  | 6.0000  |        |
|    | 10.0000                                               | 2.5000   | 4.0000   | 0.0000   | 0.0000  | 8.5000  | 999.0000 | 0.0000  |        |
|    | -0.1000                                               | 0.0000   | -2.3700  | 8.7410   | 13.3640 | 0.6690  | 0.9745   | 0.0000  |        |
|    | -11.0000                                              | 2.7466   | 1.0338   | 4.0000   | 2.8793  | 0.0000  | 0.0000   | 0.0000  |        |
| 67 | ! Nr of bonds; Edis1;LPpen;n.u.;pbe1;pbo5;13corr;pbo6 |          |          |          |         |         |          |         |        |
|    | pbe2;pbo3;pbo4;Etrip;pbo1;pbo2;ovcorr                 |          |          |          |         |         |          |         |        |
| 1  | 1                                                     | 158.2004 | 99.1897  | 78.0000  | -0.7738 | -0.4550 | 1.0000   | 37.6117 | 0.4147 |
|    |                                                       | 0.4590   | -0.1000  | 9.1628   | 1.0000  | -0.0777 | 6.7268   | 1.0000  | 0.0000 |
| 1  | 2                                                     | 169.4760 | 0.0000   | 0.0000   | -0.6083 | 0.0000  | 1.0000   | 6.0000  | 0.7652 |
|    |                                                       | 5.2290   | 1.0000   | 0.0000   | 1.0000  | -0.0500 | 6.9136   | 0.0000  | 0.0000 |
| 2  | 2                                                     | 153.3934 | 0.0000   | 0.0000   | -0.4600 | 0.0000  | 1.0000   | 6.0000  | 0.7300 |
|    |                                                       | 6.2500   | 1.0000   | 0.0000   | 1.0000  | -0.0790 | 6.0552   | 0.0000  | 0.0000 |
| 1  | 3                                                     | 164.4303 | 82.6772  | 60.8077  | -0.3739 | -0.2351 | 1.0000   | 10.5036 | 1.0000 |
|    |                                                       | 0.4475   | -0.2288  | 7.0250   | 1.0000  | -0.1363 | 4.8734   | 0.0000  | 0.0000 |

3 3 142.2858 145.0000 50.8293 0.2506 -0.1000 1.0000 29.7503 0.6051  
0.3451 -0.1055 9.0000 1.0000 -0.1225 5.5000 1.0000 0.0000  
1 4 134.1215 140.2179 79.9745 0.0163 -0.1428 1.0000 27.0617 0.2000  
0.1387 -0.3681 7.1611 1.0000 -0.1000 5.0825 1.0000 0.0000  
3 4 130.8596 169.4551 40.0000 0.3837 -0.1639 1.0000 35.0000 0.2000  
1.0000 -0.3579 7.0004 1.0000 -0.1193 6.8773 1.0000 0.0000  
4 4 157.9384 82.5526 152.5336 0.4010 -0.1034 1.0000 12.4261 0.5828  
0.1578 -0.1509 11.9186 1.0000 -0.0861 5.4271 1.0000 0.0000  
2 3 160.0000 0.0000 0.0000 -0.5725 0.0000 1.0000 6.0000 0.5626  
1.1150 1.0000 0.0000 0.0000 -0.0920 4.2790 0.0000 0.0000  
2 4 185.3171 0.0000 0.0000 -0.3689 0.0000 1.0000 6.0000 0.2854  
7.6517 1.0000 0.0000 1.0000 -0.0408 6.0255 0.0000 0.0000  
1 5 128.7959 56.4134 39.0716 0.0688 -0.4463 1.0000 31.1766 0.4530  
0.1955 -0.3587 6.2148 1.0000 -0.0770 6.6386 1.0000 0.0000  
2 5 136.1049 0.0000 0.0000 -0.4669 0.0000 1.0000 6.0000 0.3803  
10.5730 1.0000 0.0000 1.0000 -0.1000 7.0000 1.0000 0.0000  
3 5 135.6998 220.0000 40.0000 0.5848 -0.2406 1.0000 22.1005 0.2335  
0.7069 -0.2681 8.3465 1.0000 -0.0922 5.4651 1.0000 0.0000  
4 5 0.0000 0.0000 0.0000 0.5000 -0.2000 1.0000 40.0000 0.3000  
0.4000 -0.2500 9.0000 1.0000 -0.1000 6.0000 1.0000 0.0000  
5 5 0.0000 0.0000 0.0000 0.2500 -0.5000 1.0000 20.0000 1.0000  
0.2500 -0.2500 10.0000 1.0000 -0.1000 8.0000 1.0000 0.0000  
2 6 58.6896 0.0000 0.0000 -0.0203 -0.1418 1.0000 13.1260 0.0230  
8.2136 -0.1310 0.0000 1.0000 -0.2692 6.4254 0.0000 24.4461  
3 6 87.0227 0.0000 43.3991 0.0030 -0.3000 1.0000 36.0000 0.0250  
0.0087 -0.2500 12.0000 1.0000 -0.0439 6.6073 1.0000 24.4461  
6 6 32.3808 0.0000 0.0000 -0.0076 -0.2000 0.0000 16.0000 0.2641  
4.8726 -0.2000 10.0000 1.0000 -0.0729 4.6319 0.0000 0.0000  
1 7 110.0000 92.0000 0.0000 0.2171 -0.1418 1.0000 13.1260 0.6000  
0.3601 -0.1310 10.7257 1.0000 -0.0869 5.3302 1.0000 0.0000  
2 7 0.1466 0.0000 0.0000 0.2250 -0.1418 1.0000 13.1260 0.6000  
0.3912 -0.1310 0.0000 1.0000 -0.1029 9.3302 0.0000 0.0000  
3 7 201.0058 194.1410 0.0000 1.0000 -0.5000 1.0000 25.0000 0.4873  
0.4358 -0.1571 15.8745 1.0000 -0.2431 6.3823 1.0000 0.0000  
4 7 130.0000 0.0000 0.0000 0.2171 -0.1418 1.0000 13.1260 0.6000  
0.3601 -0.1310 10.7257 1.0000 -0.0869 5.3302 1.0000 0.0000  
6 7 0.1000 0.0000 0.0000 0.2500 -0.5000 1.0000 35.0000 0.6000  
0.5000 -0.5000 20.0000 1.0000 -0.2000 10.0000 1.0000 0.0000

|   |   |          |         |         |         |         |         |         |        |
|---|---|----------|---------|---------|---------|---------|---------|---------|--------|
| 7 | 7 | 0.0000   | 0.0000  | 0.0000  | 0.2171  | -0.5000 | 1.0000  | 35.0000 | 0.6000 |
|   |   | 0.5000   | -0.5000 | 20.0000 | 1.0000  | -0.2000 | 10.0000 | 1.0000  | 0.0000 |
| 1 | 8 | 0.0000   | 0.0000  | 0.0000  | -1.0000 | -0.3000 | 1.0000  | 36.0000 | 0.7000 |
|   |   | 10.1151  | -0.3500 | 25.0000 | 1.0000  | -0.1053 | 8.2003  | 1.0000  | 0.0000 |
| 2 | 8 | 0.0000   | 0.0000  | 0.0000  | -1.0000 | -0.3000 | 1.0000  | 36.0000 | 0.7000 |
|   |   | 10.1151  | -0.3500 | 25.0000 | 1.0000  | -0.1053 | 8.2003  | 1.0000  | 0.0000 |
| 3 | 8 | 45.8933  | 0.0000  | 0.0000  | -0.1511 | -0.3000 | 1.0000  | 36.0000 | 0.3105 |
|   |   | 5.8448   | -0.3500 | 25.0000 | 1.0000  | -0.0659 | 7.9140  | 1.0000  | 0.0000 |
| 4 | 8 | 0.0000   | 0.0000  | 0.0000  | -1.0000 | -0.3000 | 1.0000  | 36.0000 | 0.7000 |
|   |   | 10.1151  | -0.3500 | 25.0000 | 1.0000  | -0.1053 | 8.2003  | 1.0000  | 0.0000 |
| 5 | 8 | 0.0000   | 0.0000  | 0.0000  | -1.0000 | -0.3000 | 1.0000  | 36.0000 | 0.7000 |
|   |   | 10.1151  | -0.3500 | 25.0000 | 1.0000  | -0.1053 | 8.2003  | 1.0000  | 0.0000 |
| 6 | 8 | 0.0000   | 0.0000  | 0.0000  | 0.2500  | -0.5000 | 1.0000  | 35.0000 | 0.6000 |
|   |   | 0.5000   | -0.5000 | 20.0000 | 1.0000  | -0.2000 | 10.0000 | 1.0000  | 0.0000 |
| 7 | 8 | 0.0000   | 0.0000  | 0.0000  | 0.2500  | -0.5000 | 1.0000  | 35.0000 | 0.6000 |
|   |   | 0.5000   | -0.5000 | 20.0000 | 1.0000  | -0.2000 | 10.0000 | 1.0000  | 0.0000 |
| 8 | 8 | 64.4508  | 0.0000  | 0.0000  | -0.3738 | 0.3000  | 0.0000  | 25.0000 | 0.2158 |
|   |   | 0.9915   | -0.4000 | 12.0000 | 1.0000  | -0.0515 | 5.0000  | 0.0000  | 0.0000 |
| 4 | 6 | 50.0000  | 10.0901 | 0.0000  | -1.0000 | -0.3000 | 1.0000  | 36.0000 | 0.7058 |
|   |   | 0.8567   | -0.3487 | 17.4990 | 1.0000  | -0.0794 | 8.2232  | 1.0000  | 0.0000 |
| 1 | 9 | 0.0000   | 0.0000  | 0.0000  | -0.2872 | -0.3000 | 1.0000  | 36.0000 | 0.0082 |
|   |   | 1.7973   | -0.2500 | 20.0000 | 1.0000  | -0.2578 | 6.5219  | 1.0000  | 0.0000 |
| 2 | 9 | 0.0000   | 0.0000  | 0.0000  | -0.2872 | -0.3000 | 1.0000  | 36.0000 | 0.0082 |
|   |   | 1.7973   | -0.2500 | 20.0000 | 1.0000  | -0.2578 | 6.5219  | 1.0000  | 0.0000 |
| 3 | 9 | 100.2767 | 34.7012 | 0.0000  | 2.8160  | -0.3000 | 0.0000  | 36.0000 | 0.1915 |
|   |   | -0.0406  | -0.2709 | 15.9626 | 1.0000  | -0.1264 | 7.0520  | 0.0000  | 0.0000 |
| 4 | 9 | 0.0000   | 0.0000  | 0.0000  | -0.2872 | -0.3000 | 1.0000  | 36.0000 | 0.0082 |
|   |   | 1.7973   | -0.2500 | 20.0000 | 1.0000  | -0.2578 | 6.5219  | 1.0000  | 0.0000 |
| 5 | 9 | 0.0000   | 0.0000  | 0.0000  | -0.2872 | -0.3000 | 1.0000  | 36.0000 | 0.0082 |
|   |   | 1.7973   | -0.2500 | 20.0000 | 1.0000  | -0.2578 | 6.5219  | 1.0000  | 0.0000 |
| 6 | 9 | 0.0000   | 0.0000  | 0.0000  | -0.2872 | -0.3000 | 1.0000  | 36.0000 | 0.0082 |
|   |   | 1.7973   | -0.2500 | 20.0000 | 1.0000  | -0.2578 | 6.5219  | 1.0000  | 0.0000 |
| 7 | 9 | 0.0000   | 0.0000  | 0.0000  | -0.2872 | -0.3000 | 1.0000  | 36.0000 | 0.0082 |
|   |   | 1.7973   | -0.2500 | 20.0000 | 1.0000  | -0.2578 | 6.5219  | 1.0000  | 0.0000 |
| 8 | 9 | 0.1000   | 0.0000  | 0.0000  | 0.2500  | -0.5000 | 1.0000  | 35.0000 | 0.6000 |
|   |   | 0.5000   | -0.5000 | 20.0000 | 1.0000  | -0.2000 | 10.0000 | 1.0000  | 0.0000 |
| 9 | 9 | 80.1930  | 0.0000  | 0.0000  | -0.8469 | -0.2000 | 0.0000  | 16.0000 | 0.2022 |
|   |   | 0.7528   | -0.1924 | 14.9725 | 1.0000  | -0.0885 | 5.0000  | 0.0000  | 0.0000 |

|    |    |          |         |         |         |         |         |         |        |
|----|----|----------|---------|---------|---------|---------|---------|---------|--------|
| 1  | 10 | 0.0000   | 0.0000  | 0.0000  | 0.5000  | -0.2000 | 0.0000  | 16.0000 | 0.5000 |
|    |    | 1.0001   | -0.2000 | 15.0000 | 1.0000  | -0.1000 | 10.0000 | 0.0000  | 0.0000 |
| 2  | 10 | 98.9788  | 0.0000  | 0.0000  | -0.0572 | -0.2000 | 0.0000  | 16.0000 | 1.1523 |
|    |    | 2.2822   | -0.2000 | 15.0000 | 1.0000  | -0.1093 | 5.1686  | 0.0000  | 0.0000 |
| 3  | 10 | 0.0000   | 0.0000  | 0.0000  | 0.5000  | -0.2000 | 0.0000  | 16.0000 | 0.5000 |
|    |    | 1.0001   | -0.2000 | 15.0000 | 1.0000  | -0.1000 | 10.0000 | 0.0000  | 0.0000 |
| 4  | 10 | 0.0000   | 0.0000  | 0.0000  | 0.5000  | -0.2000 | 0.0000  | 16.0000 | 0.5000 |
|    |    | 1.0001   | -0.2000 | 15.0000 | 1.0000  | -0.1000 | 10.0000 | 0.0000  | 0.0000 |
| 5  | 10 | 0.0000   | 0.0000  | 0.0000  | 0.5000  | -0.2000 | 0.0000  | 16.0000 | 0.5000 |
|    |    | 1.0001   | -0.2000 | 15.0000 | 1.0000  | -0.1000 | 10.0000 | 0.0000  | 0.0000 |
| 6  | 10 | 0.0000   | 0.0000  | 0.0000  | 0.5000  | -0.2000 | 0.0000  | 16.0000 | 0.5000 |
|    |    | 1.0001   | -0.2000 | 15.0000 | 1.0000  | -0.1000 | 10.0000 | 0.0000  | 0.0000 |
| 7  | 10 | 0.0000   | 0.0000  | 0.0000  | 0.5000  | -0.2000 | 0.0000  | 16.0000 | 0.5000 |
|    |    | 1.0001   | -0.2000 | 15.0000 | 1.0000  | -0.1000 | 10.0000 | 0.0000  | 0.0000 |
| 8  | 10 | 0.0000   | 0.0000  | 0.0000  | 0.5000  | -0.2000 | 0.0000  | 16.0000 | 0.5000 |
|    |    | 1.0001   | -0.2000 | 15.0000 | 1.0000  | -0.1000 | 10.0000 | 0.0000  | 0.0000 |
| 9  | 10 | 133.8732 | 0.0000  | 0.0000  | -0.0830 | -0.2000 | 0.0000  | 16.0000 | 0.5483 |
|    |    | 0.1065   | -0.2000 | 15.0000 | 1.0000  | -0.0553 | 8.5063  | 0.0000  | 0.0000 |
| 10 | 10 | 0.2500   | 0.0000  | 0.0000  | 0.1803  | -0.2000 | 0.0000  | 16.0000 | 0.3356 |
|    |    | 0.9228   | -0.2000 | 15.0000 | 1.0000  | -0.1178 | 5.6715  | 0.0000  | 0.0000 |
| 1  | 11 | 237.8781 | 0.0000  | 0.0000  | -0.7438 | -0.5000 | 1.0000  | 35.0000 | 1.0460 |
|    |    | 3.6661   | -0.2500 | 15.0000 | 1.0000  | -0.0800 | 5.4719  | 1.0000  | 0.0000 |
| 2  | 11 | 0.0000   | 0.0000  | 0.0000  | -0.4643 | 0.0000  | 1.0000  | 6.0000  | 0.6151 |
|    |    | 12.3710  | 1.0000  | 0.0000  | 1.0000  | -0.1008 | 8.5980  | 0.0000  | 0.0000 |
| 3  | 11 | 0.0000   | 0.0000  | 0.0000  | -0.4643 | 0.0000  | 1.0000  | 6.0000  | 0.6151 |
|    |    | 12.3710  | 1.0000  | 0.0000  | 1.0000  | -0.1008 | 8.5980  | 0.0000  | 0.0000 |
| 4  | 11 | 0.0000   | 0.0000  | 0.0000  | -0.4643 | 0.0000  | 1.0000  | 6.0000  | 0.6151 |
|    |    | 12.3710  | 1.0000  | 0.0000  | 1.0000  | -0.1008 | 8.5980  | 0.0000  | 0.0000 |
| 5  | 11 | 0.0000   | 0.0000  | 0.0000  | -0.4643 | 0.0000  | 1.0000  | 6.0000  | 0.6151 |
|    |    | 12.3710  | 1.0000  | 0.0000  | 1.0000  | -0.1008 | 8.5980  | 0.0000  | 0.0000 |
| 11 | 11 | 250.0765 | 0.0000  | 0.0000  | 0.2298  | -0.3500 | 1.0000  | 25.0000 | 0.8427 |
|    |    | 0.1167   | -0.2500 | 15.0000 | 1.0000  | -0.1506 | 7.3516  | 1.0000  | 0.0000 |
| 2  | 12 | 0.0000   | 0.0000  | 0.0000  | -0.2500 | 0.0000  | 1.0000  | 6.0000  | 0.5000 |
|    |    | 5.0000   | 1.0000  | 0.0000  | 1.0000  | -0.1000 | 10.0000 | 0.0000  | 0.0000 |
| 3  | 12 | 60.4668  | 0.0000  | 0.0000  | -0.4572 | -0.3000 | 1.0000  | 36.0000 | 0.3444 |
|    |    | 3.6756   | -0.2000 | 15.0000 | 1.0000  | -0.0630 | 5.0895  | 1.0000  | 0.0000 |
| 9  | 12 | 0.0000   | 0.0000  | 0.0000  | -0.2500 | 0.0000  | 1.0000  | 6.0000  | 0.5000 |
|    |    | 5.0000   | 1.0000  | 0.0000  | 1.0000  | -0.1000 | 10.0000 | 0.0000  | 0.0000 |

|    |                                                           |         |         |         |         |         |         |         |         |
|----|-----------------------------------------------------------|---------|---------|---------|---------|---------|---------|---------|---------|
| 12 | 12                                                        | 27.2251 | 0.0000  | 0.0000  | 0.0600  | -0.2000 | 0.0000  | 16.0000 | 0.3937  |
|    |                                                           | 1.9957  | -0.2000 | 15.0000 | 1.0000  | -0.0413 | 5.4657  | 0.0000  | 0.0000  |
| 2  | 13                                                        | 42.0900 | 0.0000  | 0.0000  | -0.0391 | -0.1418 | 1.0000  | 13.1260 | 0.0348  |
|    |                                                           | 0.9385  | -0.1310 | 0.0000  | 1.0000  | -0.1997 | 6.4136  | 0.0000  | 24.4461 |
| 3  | 13                                                        | 40.0000 | 0.0000  | 43.3991 | 1.0000  | -0.3000 | 1.0000  | 36.0000 | 1.0000  |
|    |                                                           | 0.9111  | -0.2500 | 12.0000 | 1.0000  | -0.0746 | 8.2827  | 1.0000  | 24.4461 |
| 13 | 13                                                        | 25.4008 | 0.0000  | 0.0000  | 0.2399  | -0.2000 | 0.0000  | 16.0000 | 0.4158  |
|    |                                                           | 0.5220  | -0.2000 | 10.0000 | 1.0000  | -0.0848 | 4.0000  | 0.0000  | 0.0000  |
| 9  | 13                                                        | 0.0000  | 0.0000  | 0.0000  | -0.2500 | 0.0000  | 1.0000  | 6.0000  | 0.5000  |
|    |                                                           | 5.0000  | -0.5000 | 25.0000 | 1.0000  | -0.1000 | 10.0000 | 0.0000  | 0.0000  |
| 12 | 13                                                        | 0.0000  | 0.0000  | 0.0000  | -0.2500 | 0.0000  | 1.0000  | 6.0000  | 0.5000  |
|    |                                                           | 5.0000  | -0.5000 | 25.0000 | 1.0000  | -0.1000 | 10.0000 | 0.0000  | 0.0000  |
| 30 | !Nr of off-diagonal terms; Ediss;Ro;gamma;rsigma;rpi;rpi2 |         |         |         |         |         |         |         |         |
| 1  | 2                                                         | 0.1239  | 1.4004  | 9.8467  | 1.1210  | -1.0000 | -1.0000 |         |         |
| 2  | 3                                                         | 0.0283  | 1.2885  | 10.9190 | 0.9215  | -1.0000 | -1.0000 |         |         |
| 2  | 4                                                         | 0.0687  | 1.5130  | 10.0094 | 0.9412  | -1.0000 | -1.0000 |         |         |
| 1  | 3                                                         | 0.1345  | 1.8422  | 9.7725  | 1.2835  | 1.1576  | 1.0637  |         |         |
| 1  | 4                                                         | 0.1447  | 1.8766  | 9.7990  | 1.3436  | 1.1885  | 1.1363  |         |         |
| 3  | 4                                                         | 0.1048  | 2.0003  | 10.1220 | 1.3173  | 1.1096  | 1.0206  |         |         |
| 1  | 5                                                         | 0.1408  | 1.8161  | 9.9393  | 1.7986  | 1.3021  | 1.4031  |         |         |
| 2  | 5                                                         | 0.0895  | 1.6239  | 10.0104 | 1.4640  | -1.0000 | -1.0000 |         |         |
| 3  | 5                                                         | 0.1962  | 1.7872  | 10.2319 | 1.4622  | 1.4025  | -1.0000 |         |         |
| 4  | 5                                                         | 0.1505  | 1.9000  | 10.5104 | 1.8000  | 1.4000  | -1.0000 |         |         |
| 2  | 6                                                         | 0.0100  | 1.6000  | 13.2979 | 1.8670  | -1.0000 | -1.0000 |         |         |
| 3  | 6                                                         | 0.0809  | 1.7000  | 11.4606 | 1.5177  | -1.0000 | -1.0000 |         |         |
| 3  | 7                                                         | 0.0534  | 1.7520  | 10.4281 | 1.8000  | 1.4498  | -1.0000 |         |         |
| 6  | 7                                                         | 0.1801  | 1.8566  | 9.8498  | 0.1000  | -1.0000 | -1.0000 |         |         |
| 3  | 8                                                         | 0.0825  | 1.5904  | 11.3396 | 1.5905  | -1.0000 | -1.0000 |         |         |
| 2  | 9                                                         | 0.1750  | 1.7939  | 13.5000 | 0.0100  | -1.0000 | -1.0000 |         |         |
| 3  | 9                                                         | 0.1069  | 1.7173  | 10.1157 | 1.8026  | 1.6756  | -1.0000 |         |         |
| 10 | 9                                                         | 0.1368  | 2.2000  | 12.5000 | 1.8549  | 1.4718  | -1.0000 |         |         |
| 1  | 9                                                         | 0.2035  | 1.7007  | 11.4530 | 0.0100  | -1.0000 | -1.0000 |         |         |
| 2  | 10                                                        | 0.0376  | 1.6671  | 9.6285  | 1.2123  | -1.0000 | -1.0000 |         |         |
| 3  | 10                                                        | 0.1945  | 2.2766  | 11.2353 | -1.0000 | -1.0000 | -1.0000 |         |         |
| 1  | 11                                                        | 0.1071  | 1.6243  | 11.0402 | 1.3176  | -1.0000 | -1.0000 |         |         |
| 2  | 11                                                        | 0.0431  | 1.7204  | 10.3632 | 0.5386  | -1.0000 | -1.0000 |         |         |
| 2  | 12                                                        | 0.1000  | 1.7610  | 10.4809 | 0.1000  | -1.0000 | -1.0000 |         |         |
| 3  | 12                                                        | 0.2567  | 1.8543  | 12.9856 | 1.9854  | -1.0000 | -1.0000 |         |         |



|    |                                                   |        |          |         |        |          |         |          |        |
|----|---------------------------------------------------|--------|----------|---------|--------|----------|---------|----------|--------|
| 9  | 12                                                | 0.2845 | 2.4303   | 12.9939 | 0.1000 | -1.0000  | -1.0000 |          |        |
| 2  | 13                                                | 0.0274 | 1.6386   | 13.6906 | 0.0010 | -1.0000  | -1.0000 |          |        |
| 3  | 13                                                | 0.2232 | 1.7510   | 12.1075 | 1.8479 | -1.0000  | -1.0000 |          |        |
| 9  | 13                                                | 0.3000 | 2.3514   | 13.0000 | 0.1000 | -1.0000  | -1.0000 |          |        |
| 12 | 13                                                | 0.3000 | 2.3514   | 13.0000 | 0.1000 | -1.0000  | -1.0000 |          |        |
| 95 | ! Nr of angles;at1;at2;at3;Thetao,o;ka;kb;pv1;pv2 |        |          |         |        |          |         |          |        |
| 1  | 1                                                 | 1      | 59.0573  | 30.7029 | 0.7606 | 0.0000   | 0.7180  | 6.2933   | 1.1244 |
| 1  | 1                                                 | 2      | 65.7758  | 14.5234 | 6.2481 | 0.0000   | 0.5665  | 0.0000   | 1.6255 |
| 2  | 1                                                 | 2      | 70.2607  | 25.2202 | 3.7312 | 0.0000   | 0.0050  | 0.0000   | 2.7500 |
| 1  | 2                                                 | 2      | 0.0000   | 0.0000  | 6.0000 | 0.0000   | 0.0000  | 0.0000   | 1.0400 |
| 1  | 2                                                 | 1      | 0.0000   | 3.4110  | 7.7350 | 0.0000   | 0.0000  | 0.0000   | 1.0400 |
| 2  | 2                                                 | 2      | 0.0000   | 27.9213 | 5.8635 | 0.0000   | 0.0000  | 0.0000   | 1.0400 |
| 1  | 1                                                 | 3      | 53.9517  | 7.8968  | 2.6122 | 0.0000   | 3.0000  | 58.6562  | 1.0338 |
| 3  | 1                                                 | 3      | 76.9627  | 44.2852 | 2.4177 | -25.3063 | 1.6334  | -50.0000 | 2.7392 |
| 1  | 1                                                 | 4      | 78.5538  | 21.4381 | 7.4715 | 0.0000   | 1.1046  | 50.0000  | 1.5275 |
| 3  | 1                                                 | 4      | 73.9544  | 12.4661 | 7.0000 | 0.0000   | 1.1046  | 0.0000   | 1.1880 |
| 4  | 1                                                 | 4      | 89.3168  | 20.2660 | 7.5000 | 0.0000   | 1.1046  | 0.0000   | 1.5403 |
| 2  | 1                                                 | 3      | 65.0000  | 16.3141 | 5.2730 | 0.0000   | 0.4448  | 0.0000   | 1.4077 |
| 2  | 1                                                 | 4      | 74.2929  | 31.0883 | 2.6184 | 0.0000   | 0.1000  | 0.0000   | 1.0500 |
| 1  | 2                                                 | 4      | 0.0000   | 0.0019  | 6.3000 | 0.0000   | 0.0000  | 0.0000   | 1.0400 |
| 1  | 3                                                 | 1      | 72.6199  | 42.5510 | 0.7205 | 0.0000   | 2.9294  | 0.0000   | 1.3096 |
| 1  | 3                                                 | 3      | 81.9029  | 32.2258 | 1.7397 | 0.0000   | 0.9888  | 68.1072  | 1.7777 |
| 1  | 3                                                 | 4      | 82.4890  | 31.4554 | 0.9953 | 0.0000   | 3.0000  | 0.0000   | 1.0783 |
| 3  | 3                                                 | 3      | 80.7324  | 30.4554 | 0.9953 | 0.0000   | 3.0000  | 50.0000  | 1.0783 |
| 3  | 3                                                 | 4      | 84.3637  | 31.4554 | 0.9953 | 0.0000   | 3.0000  | 0.0000   | 1.0783 |
| 4  | 3                                                 | 4      | 89.7071  | 31.4554 | 0.9953 | 0.0000   | 3.0000  | 0.0000   | 1.1519 |
| 1  | 3                                                 | 2      | 70.1101  | 13.1217 | 4.4734 | 0.0000   | 0.8433  | 0.0000   | 3.0000 |
| 2  | 3                                                 | 3      | 75.6935  | 50.0000 | 2.0000 | 0.0000   | 1.0000  | 0.0000   | 1.1680 |
| 2  | 3                                                 | 4      | 75.6201  | 18.7919 | 0.9833 | 0.0000   | 0.1000  | 0.0000   | 1.0500 |
| 2  | 3                                                 | 2      | 85.8000  | 9.8453  | 2.2720 | 0.0000   | 2.8635  | 0.0000   | 1.5800 |
| 1  | 4                                                 | 1      | 81.4699  | 7.2318  | 1.2608 | 0.0000   | 3.0000  | 0.0000   | 1.2127 |
| 1  | 4                                                 | 3      | 103.3204 | 33.0381 | 0.5787 | 0.0000   | 3.0000  | 0.0000   | 1.2127 |
| 1  | 4                                                 | 4      | 50.0000  | 25.0250 | 4.7651 | 0.0000   | 3.0000  | 0.0000   | 1.2028 |
| 3  | 4                                                 | 3      | 74.1978  | 42.1786 | 1.7845 | -18.0069 | 3.0000  | 0.0000   | 1.2127 |
| 3  | 4                                                 | 4      | 74.8600  | 43.7354 | 1.1572 | -0.9193  | 3.0000  | 0.0000   | 1.2127 |
| 4  | 4                                                 | 4      | 75.0538  | 14.8267 | 5.2794 | 0.0000   | 3.0000  | 0.0000   | 1.2127 |
| 1  | 4                                                 | 2      | 68.2294  | 29.6576 | 1.0533 | 0.0000   | 0.3481  | 0.0000   | 1.5443 |
| 2  | 4                                                 | 3      | 81.3686  | 40.0712 | 2.2396 | 0.0000   | 0.3481  | 0.0000   | 1.5443 |

|   |   |   |         |         |        |         |         |        |        |
|---|---|---|---------|---------|--------|---------|---------|--------|--------|
| 2 | 4 | 4 | 83.0104 | 43.4766 | 1.5328 | 0.0000  | 0.3481  | 0.0000 | 1.5443 |
| 2 | 4 | 2 | 79.6336 | 17.7917 | 3.7832 | 0.0000  | 0.0222  | 0.0000 | 2.0238 |
| 1 | 2 | 3 | 0.0000  | 25.0000 | 3.0000 | 0.0000  | 1.0000  | 0.0000 | 1.0400 |
| 1 | 2 | 4 | 0.0000  | 0.0019  | 6.0000 | 0.0000  | 0.0000  | 0.0000 | 1.0400 |
| 1 | 2 | 5 | 0.0000  | 0.0019  | 6.0000 | 0.0000  | 0.0000  | 0.0000 | 1.0400 |
| 3 | 2 | 3 | 0.0000  | 15.0000 | 2.8900 | 0.0000  | 0.0000  | 0.0000 | 2.8774 |
| 3 | 2 | 4 | 0.0000  | 0.0019  | 6.0000 | 0.0000  | 0.0000  | 0.0000 | 1.0400 |
| 4 | 2 | 4 | 0.0000  | 0.0019  | 6.0000 | 0.0000  | 0.0000  | 0.0000 | 1.0400 |
| 2 | 2 | 3 | 0.0000  | 8.5744  | 3.0000 | 0.0000  | 0.0000  | 0.0000 | 1.0421 |
| 2 | 2 | 4 | 0.0000  | 0.0019  | 6.0000 | 0.0000  | 0.0000  | 0.0000 | 1.0400 |
| 1 | 1 | 5 | 74.4180 | 33.4273 | 1.7018 | 0.1463  | 0.5000  | 0.0000 | 1.6178 |
| 1 | 5 | 1 | 79.7037 | 28.2036 | 1.7073 | 0.1463  | 0.5000  | 0.0000 | 1.6453 |
| 2 | 1 | 5 | 63.3289 | 29.4225 | 2.1326 | 0.0000  | 0.5000  | 0.0000 | 3.0000 |
| 1 | 5 | 2 | 85.9449 | 38.3109 | 1.2492 | 0.0000  | 0.5000  | 0.0000 | 1.1000 |
| 1 | 5 | 5 | 85.6645 | 40.0000 | 2.9274 | 0.1463  | 0.5000  | 0.0000 | 1.3830 |
| 2 | 5 | 2 | 83.8555 | 5.1317  | 0.4377 | 0.0000  | 0.5000  | 0.0000 | 3.0000 |
| 2 | 5 | 5 | 97.0064 | 32.1121 | 2.0242 | 0.0000  | 0.5000  | 0.0000 | 2.8568 |
| 3 | 5 | 3 | 81.0926 | 30.2268 | 6.4132 | -5.4471 | 2.5968  | 0.0000 | 3.0000 |
| 1 | 5 | 3 | 70.0000 | 35.0000 | 3.4223 | 0.0000  | 1.3550  | 0.0000 | 1.2002 |
| 1 | 3 | 5 | 57.3353 | 41.0012 | 1.0609 | 0.0000  | 1.3000  | 0.0000 | 3.0000 |
| 3 | 3 | 5 | 83.9753 | 31.0715 | 3.5590 | 0.0000  | 0.8161  | 0.0000 | 1.1776 |
| 2 | 3 | 5 | 89.8843 | 17.5000 | 3.3660 | 0.0000  | 2.0000  | 0.0000 | 2.0734 |
| 2 | 6 | 2 | 0.0000  | 49.8261 | 0.2093 | 0.0000  | 2.0870  | 0.0000 | 2.2895 |
| 2 | 2 | 6 | 0.0000  | 40.0366 | 3.1505 | 0.0000  | 1.1296  | 0.0000 | 1.1110 |
| 6 | 2 | 6 | 0.0000  | 0.5047  | 0.8000 | 0.0000  | 0.8933  | 0.0000 | 4.6650 |
| 2 | 6 | 6 | 0.0000  | 8.7037  | 0.0827 | 0.0000  | 3.5597  | 0.0000 | 1.1198 |
| 3 | 6 | 3 | 0.0000  | 9.2317  | 0.1000 | 0.0000  | 1.0000  | 0.0000 | 1.0920 |
| 6 | 3 | 6 | 50.0000 | 23.2193 | 7.9751 | 0.0000  | 1.1095  | 0.0000 | 2.9806 |
| 2 | 3 | 6 | 66.0423 | 5.0000  | 1.0000 | 0.0000  | 1.0000  | 0.0000 | 1.2500 |
| 2 | 6 | 3 | 0.0000  | 0.5000  | 0.1000 | 0.0000  | 1.0000  | 0.0000 | 3.0000 |
| 3 | 3 | 6 | 70.0000 | 20.0000 | 1.0000 | 0.0000  | 1.0000  | 0.0000 | 1.2500 |
| 3 | 7 | 3 | 90.0000 | 18.4167 | 0.6799 | -8.0000 | 0.1310  | 0.0000 | 2.2321 |
| 2 | 3 | 7 | 72.6004 | 9.6150  | 0.8905 | 0.0000  | 3.5473  | 0.0000 | 1.0400 |
| 3 | 3 | 7 | 60.0000 | 40.0000 | 4.0000 | 0.0000  | 1.0000  | 0.0000 | 1.0400 |
| 3 | 2 | 7 | 0.0000  | 10.0000 | 1.0000 | 0.0000  | 1.0000  | 0.0000 | 1.0400 |
| 6 | 3 | 7 | 41.0995 | 3.2207  | 7.3523 | 0.0000  | 0.1101  | 0.0000 | 1.0947 |
| 7 | 3 | 7 | 62.1312 | 7.5931  | 0.1000 | 0.0000  | 0.5154  | 0.0000 | 2.1744 |
| 1 | 3 | 7 | 74.1394 | 8.5687  | 1.7132 | 0.0000  | -0.6553 | 0.0000 | 2.2323 |

|    |                                                               |    |         |         |         |         |         |         |        |        |
|----|---------------------------------------------------------------|----|---------|---------|---------|---------|---------|---------|--------|--------|
| 2  | 7                                                             | 3  | 75.0000 | 25.0000 | 2.0000  | 0.0000  | 1.0000  | 0.0000  | 1.2500 |        |
| 3  | 7                                                             | 7  | 70.0000 | 25.0000 | 2.0000  | 0.0000  | 1.0000  | 0.0000  | 1.2500 |        |
| 3  | 9                                                             | 3  | 84.8677 | 16.3675 | 3.2283  | 0.0000  | 0.0500  | 0.0000  | 2.9991 |        |
| 9  | 3                                                             | 9  | 47.3663 | 2.3314  | 1.0467  | 0.0000  | 2.0000  | 0.0000  | 2.9601 |        |
| 10 | 9                                                             | 10 | 79.8775 | 32.7635 | 1.6551  | 0.0000  | 1.0510  | 0.0000  | 1.6270 |        |
| 9  | 10                                                            | 9  | 28.5238 | 40.0000 | 5.0000  | 0.0000  | 2.0000  | 0.0000  | 1.1000 |        |
| 3  | 3                                                             | 9  | 62.9344 | 15.0215 | 4.3743  | 0.0000  | 0.6168  | 0.0000  | 1.1673 |        |
| 3  | 9                                                             | 9  | 23.4882 | 1.3983  | 8.0000  | 0.0000  | 0.0500  | 0.0000  | 1.1000 |        |
| 2  | 3                                                             | 9  | 90.0000 | 9.7766  | 8.0000  | 0.0000  | 0.0505  | 0.0000  | 1.7257 |        |
| 1  | 3                                                             | 9  | 90.0000 | 7.6430  | 0.2869  | 0.0000  | 1.8647  | 0.0000  | 4.0000 |        |
| 3  | 2                                                             | 10 | 0.0000  | 0.0100  | 0.0100  | 0.0000  | 0.0000  | 0.0000  | 1.1456 |        |
| 11 | 1                                                             | 11 | 77.8443 | 49.0744 | 5.9913  | 0.0000  | 0.7835  | 0.0000  | 2.3020 |        |
| 1  | 11                                                            | 1  | 0.0000  | 19.9962 | 3.2299  | 0.0000  | 2.1012  | 0.0000  | 1.1537 |        |
| 1  | 11                                                            | 11 | 0.0000  | 25.0000 | 1.0000  | 0.0000  | 1.0000  | 0.0000  | 1.0400 |        |
| 11 | 1                                                             | 2  | 69.6421 | 10.0000 | 2.0000  | 0.0000  | 1.0000  | 0.0000  | 1.0400 |        |
| 2  | 3                                                             | 12 | 90.0000 | 4.4647  | 1.6312  | 0.0000  | 1.0000  | 0.0000  | 1.1000 |        |
| 3  | 12                                                            | 3  | 66.5630 | 0.5000  | 4.7184  | 0.0000  | 0.2705  | 0.0000  | 2.2188 |        |
| 12 | 3                                                             | 12 | 18.5481 | 1.8870  | 5.0000  | 0.0000  | 1.3613  | 0.0000  | 1.1000 |        |
| 9  | 3                                                             | 12 | 0.4111  | 1.8950  | 6.5533  | 0.0000  | 1.0000  | 0.0000  | 1.4431 |        |
| 3  | 13                                                            | 3  | 40.0000 | 11.4141 | 4.2832  | 0.0000  | 0.0500  | 0.0000  | 1.4341 |        |
| 13 | 3                                                             | 13 | 40.8310 | 12.4024 | 5.3546  | 0.0000  | 3.9982  | 0.0000  | 1.3599 |        |
| 2  | 3                                                             | 13 | 81.2902 | 1.9249  | 5.8682  | 0.0000  | 0.8759  | 0.0000  | 1.1719 |        |
| 3  | 3                                                             | 13 | 65.4036 | 25.0000 | 2.5106  | 0.0000  | 1.5971  | 0.0000  | 1.0000 |        |
| 9  | 3                                                             | 13 | 0.1000  | 5.0000  | 8.0000  | 0.0000  | 1.0000  | 0.0000  | 1.3417 |        |
| 12 | 3                                                             | 13 | 29.6896 | 7.1447  | 5.1773  | 0.0000  | 2.6798  | 0.0000  | 1.2300 |        |
| 57 | ! Nr of torsions;at1;at2;at3;at4;;V1;V2;V3;V2(BO);vconj;n.u;n |    |         |         |         |         |         |         |        |        |
| 1  | 1                                                             | 1  | 1       | -0.2500 | 34.7453 | 0.0288  | -6.3507 | -1.6000 | 0.0000 | 0.0000 |
| 1  | 1                                                             | 1  | 2       | -0.2500 | 29.2131 | 0.2945  | -4.9581 | -2.1802 | 0.0000 | 0.0000 |
| 2  | 1                                                             | 1  | 2       | -0.2500 | 31.2081 | 0.4539  | -4.8923 | -2.2677 | 0.0000 | 0.0000 |
| 1  | 1                                                             | 1  | 3       | 1.2799  | 20.7787 | -0.5249 | -2.5000 | -1.0000 | 0.0000 | 0.0000 |
| 2  | 1                                                             | 1  | 3       | 1.9159  | 19.8113 | 0.7914  | -4.6995 | -1.0000 | 0.0000 | 0.0000 |
| 3  | 1                                                             | 1  | 3       | -1.4477 | 16.6853 | 0.6461  | -4.9622 | -1.0000 | 0.0000 | 0.0000 |
| 1  | 1                                                             | 3  | 1       | 0.4816  | 19.6316 | -0.0057 | -2.5000 | -1.0000 | 0.0000 | 0.0000 |
| 1  | 1                                                             | 3  | 2       | 1.2044  | 80.0000 | -0.3139 | -6.1481 | -1.0000 | 0.0000 | 0.0000 |
| 2  | 1                                                             | 3  | 1       | -2.5000 | 31.0191 | 0.6165  | -2.7733 | -2.9807 | 0.0000 | 0.0000 |
| 2  | 1                                                             | 3  | 2       | -2.4875 | 70.8145 | 0.7582  | -4.2274 | -3.0000 | 0.0000 | 0.0000 |
| 1  | 1                                                             | 3  | 3       | -0.3566 | 10.0000 | 0.0816  | -2.6110 | -1.9631 | 0.0000 | 0.0000 |
| 2  | 1                                                             | 3  | 3       | -1.4383 | 80.0000 | 1.0000  | -3.6877 | -2.8000 | 0.0000 | 0.0000 |

|   |   |   |   |         |          |         |          |         |        |        |
|---|---|---|---|---------|----------|---------|----------|---------|--------|--------|
| 3 | 1 | 3 | 1 | -1.1390 | 78.0747  | -0.0964 | -4.5172  | -3.0000 | 0.0000 | 0.0000 |
| 3 | 1 | 3 | 2 | -2.5000 | 70.3345  | -1.0000 | -5.5315  | -3.0000 | 0.0000 | 0.0000 |
| 3 | 1 | 3 | 3 | -2.0234 | 80.0000  | 0.1684  | -3.1568  | -2.6174 | 0.0000 | 0.0000 |
| 1 | 3 | 3 | 1 | 1.1637  | -17.3637 | 0.5459  | -3.6005  | -2.6938 | 0.0000 | 0.0000 |
| 1 | 3 | 3 | 2 | -2.1289 | 12.8382  | 1.0000  | -5.6657  | -2.9759 | 0.0000 | 0.0000 |
| 2 | 3 | 3 | 2 | 2.5000  | -22.9397 | 0.6991  | -3.3961  | -1.0000 | 0.0000 | 0.0000 |
| 1 | 3 | 3 | 3 | 2.5000  | -25.0000 | 1.0000  | -2.5000  | -1.0000 | 0.0000 | 0.0000 |
| 2 | 3 | 3 | 3 | -2.5000 | -2.5103  | -1.0000 | -2.5000  | -1.0000 | 0.0000 | 0.0000 |
| 3 | 3 | 3 | 3 | -2.5000 | -25.0000 | 1.0000  | -2.5000  | -1.0000 | 0.0000 | 0.0000 |
| 0 | 1 | 2 | 0 | 0.0000  | 0.0000   | 0.0000  | 0.0000   | 0.0000  | 0.0000 | 0.0000 |
| 0 | 2 | 2 | 0 | 0.0000  | 0.0000   | 0.0000  | 0.0000   | 0.0000  | 0.0000 | 0.0000 |
| 0 | 2 | 3 | 0 | 0.0000  | 0.1000   | 0.0200  | -2.5415  | 0.0000  | 0.0000 | 0.0000 |
| 0 | 1 | 1 | 0 | 0.0000  | 50.0000  | 0.3000  | -4.0000  | -2.0000 | 0.0000 | 0.0000 |
| 0 | 1 | 4 | 0 | 1.7932  | 141.5515 | 0.9686  | -4.2368  | -1.9727 | 0.0000 | 0.0000 |
| 0 | 2 | 4 | 0 | -1.5000 | 0.1032   | 0.0100  | -5.0965  | 0.0000  | 0.0000 | 0.0000 |
| 0 | 3 | 4 | 0 | 1.1397  | 61.3225  | 0.5139  | -3.8507  | -3.0000 | 0.0000 | 0.0000 |
| 0 | 4 | 4 | 0 | 0.7265  | 44.3155  | 1.0000  | -4.4046  | -2.0000 | 0.0000 | 0.0000 |
| 4 | 1 | 4 | 4 | -0.0949 | 8.7582   | 0.3310  | -7.9430  | -2.0000 | 0.0000 | 0.0000 |
| 0 | 1 | 5 | 0 | 3.3423  | 30.3435  | 0.0365  | -2.7171  | 0.0000  | 0.0000 | 0.0000 |
| 0 | 5 | 5 | 0 | -0.0555 | -5.0000  | 0.1515  | -2.2056  | 0.0000  | 0.0000 | 0.0000 |
| 0 | 2 | 5 | 0 | 0.0000  | 0.0000   | 0.0000  | 0.0000   | 0.0000  | 0.0000 | 0.0000 |
| 2 | 3 | 5 | 3 | 2.5000  | 2.5000   | 0.2237  | -10.0000 | -1.0000 | 0.0000 | 0.0000 |
| 0 | 3 | 5 | 0 | -2.5000 | 50.0000  | -0.5000 | -10.0000 | -1.0000 | 0.0000 | 0.0000 |
| 0 | 6 | 6 | 0 | 0.0000  | 0.0000   | 0.1200  | -2.4426  | 0.0000  | 0.0000 | 0.0000 |
| 0 | 2 | 6 | 0 | 0.0000  | 0.0000   | 0.1200  | -2.4847  | 0.0000  | 0.0000 | 0.0000 |
| 0 | 3 | 6 | 0 | 0.0000  | 0.0000   | 0.1200  | -2.4703  | 0.0000  | 0.0000 | 0.0000 |
| 1 | 1 | 3 | 3 | -0.0002 | 20.1851  | 0.1601  | -9.0000  | -2.0000 | 0.0000 | 0.0000 |
| 1 | 3 | 3 | 1 | 0.0002  | 80.0000  | -1.5000 | -4.4848  | -2.0000 | 0.0000 | 0.0000 |
| 3 | 1 | 3 | 3 | -0.1583 | 20.0000  | 1.5000  | -9.0000  | -2.0000 | 0.0000 | 0.0000 |
| 1 | 1 | 1 | 7 | -0.3232 | 14.3871  | 0.1823  | -9.8682  | -1.7255 | 0.0000 | 0.0000 |
| 7 | 1 | 1 | 7 | -0.1452 | 50.0000  | -0.1915 | -8.0773  | -1.7255 | 0.0000 | 0.0000 |
| 0 | 1 | 7 | 0 | 4.0000  | 45.8264  | 0.9000  | -4.0000  | 0.0000  | 0.0000 | 0.0000 |
| 0 | 7 | 7 | 0 | 4.0000  | 45.8264  | 0.9000  | -4.0000  | 0.0000  | 0.0000 | 0.0000 |
| 2 | 1 | 3 | 7 | -1.5000 | 18.9285  | 0.3649  | -6.1208  | 0.0000  | 0.0000 | 0.0000 |
| 2 | 3 | 7 | 3 | 1.5000  | -1.0000  | 0.2575  | -6.2100  | 0.0000  | 0.0000 | 0.0000 |
| 1 | 3 | 7 | 3 | -1.4375 | -0.8700  | 0.9861  | -2.5424  | 0.0000  | 0.0000 | 0.0000 |
| 7 | 3 | 7 | 3 | -1.5000 | 21.5086  | -1.0000 | -4.8869  | 0.0000  | 0.0000 | 0.0000 |
| 2 | 1 | 3 | 9 | 0.0000  | 84.3556  | 0.1000  | -3.1953  | 0.0000  | 0.0000 | 0.0000 |

|    |                                                  |    |    |         |         |         |          |         |        |        |
|----|--------------------------------------------------|----|----|---------|---------|---------|----------|---------|--------|--------|
| 1  | 1                                                | 3  | 9  | 0.0000  | 51.0461 | 0.1059  | -7.2043  | 0.0000  | 0.0000 | 0.0000 |
| 2  | 3                                                | 9  | 3  | -0.2500 | 0.0100  | -0.5000 | -4.6984  | 0.0000  | 0.0000 | 0.0000 |
| 1  | 1                                                | 1  | 11 | 0.5000  | 0.1000  | 0.4683  | -11.5274 | -1.7255 | 0.0000 | 0.0000 |
| 2  | 1                                                | 1  | 11 | 0.0000  | 49.3871 | 0.2000  | -10.5765 | -1.7255 | 0.0000 | 0.0000 |
| 11 | 1                                                | 1  | 11 | -0.5000 | 95.4727 | -0.2080 | -4.8579  | -1.7255 | 0.0000 | 0.0000 |
| 0  | 1                                                | 11 | 0  | 4.0000  | 45.8264 | 0.9000  | -4.0000  | 0.0000  | 0.0000 | 0.0000 |
| 0  | 11                                               | 11 | 0  | 4.0000  | 45.8264 | 0.8897  | -4.0000  | 0.0000  | 0.0000 | 0.0000 |
| 9  | ! Nr of hydrogen bonds;at1;at2;at3;Rhb;Dehb;vhb1 |    |    |         |         |         |          |         |        |        |
| 3  | 2                                                | 3  |    | 2.1200  | -3.5800 | 1.4500  | 19.5000  |         |        |        |
| 3  | 2                                                | 4  |    | 1.6787  | -3.9601 | 1.4500  | 19.5000  |         |        |        |
| 4  | 2                                                | 3  |    | 1.5585  | -3.9305 | 1.4500  | 19.5000  |         |        |        |
| 4  | 2                                                | 4  |    | 1.9336  | -5.8831 | 1.4500  | 19.5000  |         |        |        |
| 3  | 2                                                | 5  |    | 1.5000  | -2.0000 | 1.4500  | 19.5000  |         |        |        |
| 4  | 2                                                | 5  |    | 1.5000  | -2.0000 | 1.4500  | 19.5000  |         |        |        |
| 5  | 2                                                | 3  |    | 1.5000  | -2.0000 | 1.4500  | 19.5000  |         |        |        |
| 5  | 2                                                | 4  |    | 1.5000  | -2.0000 | 1.4500  | 19.5000  |         |        |        |
| 5  | 2                                                | 5  |    | 1.5000  | -2.0000 | 1.4500  | 19.5000  |         |        |        |

## References

1. van Duin, A. C.; Baas, J. M.; Van De Graaf, B., Delft molecular mechanics: a new approach to hydrocarbon force fields. Inclusion of a geometry-dependent charge calculation. *Journal of the Chemical Society, Faraday Transactions* **1994**, *90* (19), 2881-2895.
